# Supplementary material for: Genomic Characteristics and Phylogenetic Analyses of a Multiple Drug-Resistant Klebsiella pneumoniae Harboring Plasmid-Mediated MCR-1 Isolated from Tai’an City, China
Source: MDPI journal article supplement (doi:10.3390/pathogens12020221), 2023-01-31
Supplement: s1 [file s1]

Table S1 The accession number of 100 plasmids

|    |            |                                                                                                             |
|----|------------|-------------------------------------------------------------------------------------------------------------|
| 1  | KY463454.1 | <i>Escherichia coli</i> strain WCHEC1618 plasmid pMCR-WCHEC1618, complete sequence                          |
| 2  | KY463451.1 | <i>Escherichia coli</i> strain WCHEC1606 plasmid pMCR-WCHEC1606, complete sequence                          |
| 3  | MK574665.1 | <i>Escherichia coli</i> strain DIB-1 plasmid pDIB-1, complete sequence                                      |
| 4  | MK836307.1 | <i>Escherichia coli</i> strain NMG38 plasmid pMCR-NMG38, complete sequence                                  |
| 5  | MK172815.1 | <i>Escherichia coli</i> plasmid pMCR-1-Msc, complete sequence                                               |
| 6  | MT929278.1 | <i>Escherichia coli</i> strain 1253-17-A2 plasmid pMCR-1253-A2, complete sequence                           |
| 7  | CP080094.1 | <i>Salmonella enterica</i> strain SLR1-8245 plasmid pS8245-3, complete sequence                             |
| 8  | MK869757.1 | <i>Escherichia coli</i> strain MFDS2258 plasmid pMFDS2258.1                                                 |
| 9  | MK875285.1 | <i>Escherichia coli</i> strain MFDS1300 plasmid pMFDS1300.1, complete sequence                              |
| 10 | MK875282.1 | <i>Escherichia coli</i> strain MFDS1318 plasmid pMFDS1318.1, complete sequence                              |
| 11 | MK869758.1 | <i>Escherichia coli</i> strain MFDS2254 plasmid pMFDS2254.1                                                 |
| 12 | CP042970.1 | <i>Escherichia coli</i> strain CFSAN061769 plasmid pCFSAN061769-01, complete sequence                       |
| 13 | CP018773.2 | <i>Escherichia coli</i> strain 2016C-3936C1 plasmid pMCR-1-CT, complete sequence                            |
| 14 | MT929280.1 | <i>Klebsiella pneumoniae</i> strain 1525-17-B1 plasmid pMCR-1525-B1, complete sequence                      |
| 15 | MT929279.1 | <i>Escherichia coli</i> strain 1449-17-C1 plasmid pMCR-1449-C1, complete sequence                           |
| 16 | MK875286.1 | <i>Escherichia coli</i> strain MFDS1029 plasmid pMFDS1029.1, complete sequence                              |
| 17 | MF449287.1 | <i>Escherichia coli</i> strain T71115 plasmid pIBMC-mcr1, complete sequence                                 |
| 18 | MT929277.1 | <i>Escherichia coli</i> strain 1139-17-A1 plasmid pMCR-1139-A1, complete sequence                           |
| 19 | MT929276.1 | <i>Escherichia coli</i> strain 1138-17-D1 plasmid pMCR-1138-D1, complete sequence                           |
| 20 | MK875284.1 | <i>Escherichia coli</i> strain MFDS1310 plasmid pMFDS1310.1, complete sequence                              |
| 21 | CP092305.1 | <i>Salmonella enterica</i> strain PNUSAS070846 plasmid PNUSAS070846-1, complete sequence                    |
| 22 | MT929275.1 | <i>Escherichia coli</i> strain 1413-17-E1 plasmid pMCR-1413-E1, complete sequence                           |
| 23 | CP092309.1 | <i>Salmonella enterica</i> strain PNUSAS037276 plasmid PNUSAS037276-2, complete sequence                    |
| 24 | MT929282.1 | <i>Escherichia coli</i> strain 1525-17-D1 plasmid pMCR-1525-D1, complete sequence                           |
| 25 | CP092316.1 | <i>Salmonella enterica</i> strain PNUSAS011707 plasmid PNUSAS011707-2, complete sequence                    |
| 26 | CP037906.1 | <i>Escherichia coli</i> strain LHM10-1 plasmid pLHM10-1-MCR-1, complete sequence                            |
| 27 | CP069685.1 | <i>Escherichia coli</i> O176:H45 strain MIN9 plasmid pMUB-MIN9-MCR, complete sequence                       |
| 28 | MH938808.1 | <i>Escherichia coli</i> strain LHM10-1 plasmid pLHM10-1-mcr-1, complete sequence                            |
| 29 | KX254343.1 | <i>Escherichia coli</i> strain GD-8 plasmid pECGD-8-33, complete sequence                                   |
| 30 | KY689634.1 | <i>Escherichia coli</i> strain 31349 plasmid p31349, complete sequence                                      |
| 31 | KY565556.1 | <i>Escherichia coli</i> strain Mcp0271 plasmid pMcp0271, complete sequence                                  |
| 32 | MH143576.1 | <i>Salmonella enterica</i> subsp. enterica serovar California strain SL01 plasmid pMCR-1, complete sequence |
| 33 | MT929289.1 | <i>Escherichia coli</i> strain 1138-17-A1 plasmid pMCR-1138-A1, complete sequence                           |
| 34 | KX084392.1 | <i>Escherichia coli</i> strain B65 plasmid pECJS-B65-33, complete sequence                                  |
| 35 | LR882921.1 | <i>Escherichia coli</i> genome assembly, plasmid: 1                                                         |

|    |            |                                                                                                        |
|----|------------|--------------------------------------------------------------------------------------------------------|
| 36 | LR882918.1 | <i>Escherichia coli</i> genome assembly, plasmid: 1                                                    |
| 37 | CP063489.1 | <i>Escherichia coli</i> strain EF7-18-51 plasmid pEF7-18-51-2, complete sequence                       |
| 38 | CP092328.1 | <i>Salmonella enterica</i> strain PNUSAS020938 plasmid PNUSAS020938-2, complete sequence               |
| 39 | CP042607.1 | <i>Escherichia coli</i> strain NCYU-29-19 plasmid pNCYU-29-19-1-MCR1, complete sequence                |
| 40 | MT929281.1 | <i>Klebsiella pneumoniae</i> strain 1525-17-C2 plasmid pMCR-1525-C2, complete sequence                 |
| 41 | CP090286.1 | <i>Escherichia coli</i> strain E-T344-1 plasmid pE-T344-1-mcr-1, complete sequence                     |
| 42 | CP028167.1 | <i>Escherichia coli</i> strain CFSAN064036 plasmid pGMI17-004-2, complete sequence                     |
| 43 | CP016550.1 | <i>Escherichia coli</i> strain O177:H21 plasmid unnamed4, complete sequence                            |
| 44 | CP019908.1 | <i>Escherichia coli</i> strain MDR-56 plasmid pMCR1-NY, complete sequence                              |
| 45 | CP092303.1 | <i>Salmonella enterica</i> strain PNUSAS047891 plasmid PNUSAS047891-2, complete sequence               |
| 46 | LC511660.1 | <i>Escherichia coli</i> 2017.19.01CC plasmid p2017.19.01CC DNA, complete genome                        |
| 47 | CP060967.1 | <i>Escherichia coli</i> strain EC7 plasmid pEC7-mcr-1, complete sequence                               |
| 48 | CP059291.1 | <i>Escherichia coli</i> strain 1506 plasmid p1506-3-mcr, complete sequence                             |
| 49 | CP048826.1 | <i>Escherichia coli</i> strain QEC11-421 plasmid pEcQE11-421-5, complete sequence                      |
| 50 | CP092296.1 | <i>Salmonella enterica</i> strain PNUSAS070160 plasmid PNUSAS070160-2, complete sequence               |
| 51 | CP060524.1 | <i>Salmonella enterica</i> strain SLR1-8250 plasmid pS8250-2, complete sequence                        |
| 52 | CP082794.1 | <i>Klebsiella pneumoniae</i> strain KP4823 plasmid pKP4823-mcr, complete sequence                      |
| 53 | CP069650.1 | <i>Escherichia coli</i> O7:H4 strain MIN14 plasmid pMUB-MIN14-MCR, complete sequence                   |
| 54 | LR882927.1 | <i>Escherichia coli</i> genome assembly, plasmid: 1                                                    |
| 55 | CP069669.1 | <i>Escherichia coli</i> O89m:H9 strain MIN11 plasmid pMUB-MIN11-MCR, complete sequence                 |
| 56 | CP069661.1 | <i>Escherichia coli</i> O89m:H10 strain MIN12 plasmid pMUB-MIN12-MCR, complete sequence                |
| 57 | CP092330.1 | <i>Salmonella enterica</i> strain PNUSAS006351 plasmid PNUSAS006351-1, complete sequence               |
| 58 | MG557853.1 | <i>Escherichia coli</i> plasmid PN25, complete sequence                                                |
| 59 | CP063335.1 | <i>Escherichia coli</i> strain BS74R-D plasmid pBS74R-D-3, complete sequence                           |
| 60 | CP011290.1 | <i>Salmonella enterica</i> subsp. diarizonae strain 11-01853 plasmid unnamed1, complete sequence       |
| 61 | CP060977.1 | <i>Escherichia coli</i> strain EC4 plasmid pEC4-4, complete sequence                                   |
| 62 | CP024919.1 | <i>Klebsiella pneumoniae</i> strain NH54 plasmid pKPNH54.3, complete sequence                          |
| 63 | CP033849.1 | <i>Escherichia coli</i> strain FDAARGOS-497 plasmid unnamed3, complete sequence                        |
| 64 | LC479085.1 | <i>Escherichia coli</i> B2 plasmid pB2 DNA, complete sequence                                          |
| 65 | MK477615.1 | <i>Salmonella enterica</i> strain SH16G1509 plasmid pSH16G1509, complete sequence                      |
| 66 | KX772777.1 | <i>Escherichia coli</i> strain E15004 plasmid pE15004, complete sequence                               |
| 67 | MW557326.1 | <i>Salmonella enterica</i> subsp. enterica serovar <i>Typhimurium</i> strain 16062 plasmid p16062-MCR. |
| 68 | MW010027.1 | <i>Escherichia coli</i> strain EC1283 plasmid pEC1283, complete sequence                               |
| 69 | MW010026.1 | <i>Escherichia coli</i> strain EC1280 plasmid pEC1281, complete sequence                               |
| 70 | MW010025.1 | <i>Escherichia coli</i> strain EC1279 plasmid pEC1279, complete sequence                               |
| 71 | MW010024.1 | <i>Escherichia coli</i> strain EC1281 plasmid pEC1281, complete sequence                               |

|     |            |                                                                                                                   |
|-----|------------|-------------------------------------------------------------------------------------------------------------------|
| 72  | LC341397.1 | <i>Escherichia coli</i> plasmid pEC15-101mcr DNA, complete sequence                                               |
| 73  | MN200943.1 | <i>Escherichia coli</i> strain E648 plasmid pE648MCR-1, complete sequence                                         |
| 74  | LC477294.1 | <i>Escherichia coli</i> A2 plasmid pA2 DNA, complete sequence                                                     |
| 75  | LC477138.1 | <i>Escherichia coli</i> A1 plasmid pA1 DNA, complete sequence                                                     |
| 76  | MK477610.1 | <i>Salmonella enterica</i> strain SH15G2167 plasmid pSH15G2167, complete sequence                                 |
| 77  | MK477604.1 | <i>Salmonella enterica</i> strain SH15G1397 plasmid pSH15G1397, complete sequence                                 |
| 78  | MG257881.1 | <i>Escherichia coli</i> strain P744T plasmid pP744T-MCR1, complete sequence                                       |
| 79  | CP031291.1 | <i>Salmonella enterica</i> subsp. enterica serovar 4, 12:i:- strain N17-0346 plasmid pN17-0346, complete sequence |
| 80  | MG210937.1 | <i>Escherichia coli</i> strain GZ49260 plasmid pGZ49260, complete sequence                                        |
| 81  | AP018411.1 | <i>Klebsiella pneumoniae</i> plasmid pRYU3223C-1 RYU 3223 DNA, complete sequence                                  |
| 82  | MF175191.1 | <i>Escherichia coli</i> strain CDF8 plasmid pCDF8, complete sequence                                              |
| 83  | KX711706.1 | <i>Escherichia coli</i> strain CSZ4 plasmid pCSZ4, complete sequence                                              |
| 84  | MF175185.1 | <i>Escherichia coli</i> strain PF52 plasmid pPF52, complete sequence                                              |
| 85  | MF175184.1 | <i>Escherichia coli</i> strain PF91 plasmid pPF91, complete sequence                                              |
| 86  | KX711707.1 | <i>Escherichia coli</i> strain FS170G plasmid pFS170G, complete sequence                                          |
| 87  | KX129783.1 | <i>Escherichia coli</i> strain OW3E1 plasmid pOW3E1, complete sequence                                            |
| 88  | KX236309.1 | <i>Klebsiella pneumoniae</i> strain KP-6884 plasmid pMCR1.2-IT, complete sequence                                 |
| 89  | MF175186.1 | <i>Escherichia coli</i> strain PF11 plasmid pPF11, complete sequence                                              |
| 90  | KY075660.1 | <i>Escherichia coli</i> strain GD65 plasmid pGD65-4, complete sequence                                            |
| 91  | MT667261.1 | <i>Escherichia coli</i> strain GDE6P129 plasmid pHNEP129, complete sequence                                       |
| 92  | KY075653.1 | <i>Escherichia coli</i> strain Lishui12 plasmid pLishui12-2, complete sequence                                    |
| 93  | KY075652.1 | <i>Escherichia coli</i> strain GD46 plasmid pGD46-3, complete sequence                                            |
| 94  | MF175190.1 | <i>Escherichia coli</i> strain ColR598 plasmid pColR598-1, complete sequence                                      |
| 95  | KY075655.1 | <i>Escherichia coli</i> strain WH03 plasmid pWH03-3, complete sequence                                            |
| 96  | KY471146.1 | <i>Escherichia coli</i> strain EC111 plasmid pEC111, complete sequence                                            |
| 97  | KY120364.1 | <i>Salmonella enterica</i> subsp. enterica serovar <i>Typhimurium</i> strain NG14043 plasmid pNG14043.            |
| 98  | MW264508.1 | <i>Salmonella enterica</i> subsp. enterica serovar <i>Typhimurium</i> strain S67 plasmid pS67, complete sequence  |
| 99  | MW264509.1 | <i>Salmonella enterica</i> subsp. enterica serovar <i>Typhimurium</i> strain S69 plasmid pS69, complete sequence  |
| 100 | MW264507.1 | <i>Salmonella enterica</i> subsp. enterica serovar <i>Typhimurium</i> strain S60 plasmid pS60, complete sequence  |

Table S2 The virulence gene on chromosome KPTA-2108

| VFclass          | Virulence factors | Related genes                                                                                                                                    |
|------------------|-------------------|--------------------------------------------------------------------------------------------------------------------------------------------------|
| Adherence        | Type 3 fimbriae   | <i>mrkA, mrkB, mrkC, mrkD, mrkF, mrkH, mrkI, mrkJ</i>                                                                                            |
|                  | Type I fimbriae   | <i>fimA, fimB, fimC, fimD, fimE, fimF, fimG, fimH, fimG, fimH, fimI, fimK</i>                                                                    |
| Antiphagocytosis | Capsule           | <i>Capsule I</i>                                                                                                                                 |
| Efflux pump      | AcrAB             | <i>arcA, acrB</i>                                                                                                                                |
|                  | Aerobactin        | <i>iucA, iucB, iucC, iucD, iutA</i>                                                                                                              |
| Iron uptake      | Enterobactin      | <i>entA, entB, entC, entD, entE, entF, entS, fepA, fepB, fepC, fepD, fepG, fes</i>                                                               |
|                  | Salmochelin       | <i>iroE, iroN</i>                                                                                                                                |
|                  | Yersiniabactin    | <i>ybtP</i>                                                                                                                                      |
| Regulation       | RcsAB             | <i>rcsA, rcsB</i>                                                                                                                                |
|                  | RmpA              | <i>rmpA</i>                                                                                                                                      |
| Secretion system | T6SS-I            | <i>clpV/tssH, impA/tssA, ompA, dotU/tssL, hcp/tssD, icmF/tssM, sciN/tssJ, tliI, tleI, tssF, tssG, vasE/tssK, vgrG/tssI, vipA/tssB, vipB/tssC</i> |
|                  | T6SS-II           | <i>clpV</i>                                                                                                                                      |
|                  | T6SS-III          | <i>ompA, dotU, icmF, impA, impF, impG, impH, impJ, lysM, sciN, vgrG</i>                                                                          |
| Serum resistance | LPS rfb locus     | <i>gluP, wbmI, bplA</i>                                                                                                                          |
| Toxin            | Colibactin        | <i>clbL, clbG, clbD, clbP</i>                                                                                                                    |

Table S3 Mobile genetic elements and resistance genes carried by chromosome KPTA-2108

| Strain     | Length (bp) | Compound transposon<br>(position in contig) | Carrier of resistance factors                                         |
|------------|-------------|---------------------------------------------|-----------------------------------------------------------------------|
| chromosome | 5306347     | cn-9244-IS26 (3836210-3845454)              | <i>rmtB</i> , <i>tet(G)</i> , <i>bla<sub>TEM-1B</sub></i>             |
|            |             | cn-2946-IS26 (3844634-3847580)              | <i>bleO</i>                                                           |
|            |             | cn-18551-IS26 (3818479-3837030)             | <i>qnrB4</i> , <i>sul1</i> , <i>bla<sub>DHA-1</sub></i> , <i>qacE</i> |
|            |             | cn-50151-IS26 (3846761-3896912)             | <i>msr(E)</i> , <i>armA</i> , <i>msr(E)</i> , <i>mph(E)</i>           |

Table S4 Mobile genetic elements and resistance genes carried by plasmid KPTA-2108

| Plasmid name | Length (bp) | Plasmid type | Mobile genetic elements (position in contig)                                                     | Drug resistance gene (accession number) (position in contig) |
|--------------|-------------|--------------|--------------------------------------------------------------------------------------------------|--------------------------------------------------------------|
| pMJ4-1       | 164378      | IncFIB       | IS26 (163143-163962)                                                                             | <i>bleO</i> (AF051917) (131623-132016)                       |
|              |             |              | IS26 (4022-4841)                                                                                 | <i>aac(6')-Ib-cr</i> (DQ303918) (149103-149702)              |
|              |             |              | ISKpn24 (39991-42444)                                                                            | <i>aadA16</i> (EU675686) (146922-147767)                     |
|              |             |              | ISEcl1 (43464-44799)                                                                             | <i>aph(6)-Id</i> (M28829) (163971-164378)                    |
|              |             |              | ISKpn26 (49498-50692)                                                                            | <i>aac(3)-IId</i> (EU022314) (160253-161113)                 |
|              |             |              | IS903 (82220-83275)                                                                              | <i>aph(3')-Ia</i> (V00359) (162240-163055)                   |
|              |             |              | IS903 (54251-55307)                                                                              | <i>ARR-3</i> (JF806499) (148554-149006 )                     |
|              |             |              | cn-2680-IS26 (161282-163962)                                                                     | <i>mph(A)</i> (D16251) (141337-142242)                       |
|              |             |              | cn-9025-IS903 (54250-83275) ( <i>aph(3')-Ia</i> )                                                | <i>sul1</i> (U12338) (145625-146464)                         |
|              |             |              |                                                                                                  | <i>sul2</i> (HQ840942) (1344-2159)                           |
|              |             |              |                                                                                                  | <i>dfrA27</i> (FJ459817) (147948-148421)                     |
|              |             |              |                                                                                                  | <i>tet(A)</i> (AJ517790) (137905-139104 )                    |
|              |             |              |                                                                                                  | <i>aadA16</i> (EU675686) (146922-147767 )                    |
|              |             |              |                                                                                                  | <i>qacE</i> (X68232) (146524-14680)                          |
|              |             |              |                                                                                                  | <i>floR</i> (AF118107) (154945-156158)                       |
| pMJ4-2       | 98026       | IncII-I      | ISEc37 (11297-13125)                                                                             | —                                                            |
| pMJ4-3       | 72739       | —            | IS26 (47266-48085)                                                                               | <i>bla<sub>CTX-M-15</sub></i> (AY044436) (48405-49280)       |
|              |             |              | ISKpn19 (54291-57139)                                                                            | <i>bla<sub>TEM-1B</sub></i> (AY458016) (43894-44754)         |
|              |             |              | cn-11610-ISKpn19 (41025-52635) ( <i>bla<sub>CTX-M-15</sub></i> ) ( <i>bla<sub>TEM-1B</sub></i> ) | <i>qnrS1</i> (AB187515) (52886-53542)                        |
|              |             |              | cn-4640-ISKpn19 (52499-57139) ( <i>qnrS1</i> )                                                   |                                                              |
| pMJ4-44-MCR  | 30124       | IncX4        | —                                                                                                | <i>mcr-1</i> (KP347127) (25134-26759)                        |
